# Supplementary material
Source: Springer Nature journal article supplement (https://www.springermedizin.de/resource/supplementary/13058_2010_2755_MOESM5_ESM.pdf/9702084)
Supplement: MOESM5 [file 9702084]

**Additional file 5: LOH result for ER+ and ER- BRCA1-associated breast cancers analyzed.**

| Patient | Mutation designation | Type of mutation   | Age | ER status | m%   | NM_score | LOH result | BRCA1 promoter methylation |
|---------|----------------------|--------------------|-----|-----------|------|----------|------------|----------------------------|
| 1       | 3604delA             | deletion           | 40  | Neg       | 74.7 |          | LOH wt     |                            |
| 2       | 1137delAG            | deletion           | 35  | Neg       | 82.9 |          | LOH wt     |                            |
| 3       | 1137delG             | deletion           | 36  | Neg       | 19.3 |          | LOH mut    | Neg                        |
| 4       | 1294del40            | deletion           | 41  | Neg       | 89.3 |          | LOH wt     | Neg                        |
| 5       | 1294del40            | deletion           | 44  | Pos       | 91.9 |          | LOH wt     |                            |
| 6       | 1294del40            | deletion           | 52  | Pos       | 97   |          | LOH wt     |                            |
| 7       | 1294del40            | deletion           | 32  | Pos       | 98.2 |          | LOH wt     |                            |
| 8       | 185insA              | insertion          | 40  | Pos       | 39.5 |          | LOH mut    |                            |
| 9       | 187delAG             | deletion           | 56  | Neg       | 21.7 |          | LOH mut    | Neg                        |
| 10      | 187delAG             | deletion           | 31  | Neg       | 40.1 |          | no LOH     | Neg                        |
| 11      | 187delAG             | deletion           | 28  | Neg       | 62.7 |          | LOH wt     |                            |
| 12      | 187delAG             | deletion           | 44  | Neg       | 65.1 |          | LOH wt     | Neg                        |
| 13      | 187delAG             | deletion           | 39  | Neg       | 67.4 |          | LOH wt     |                            |
| 14      | 187delAG             | deletion           | 73  | Neg       | 84.5 |          | LOH wt     |                            |
| 15      | 187delAG             | deletion           | 44  | Neg       | 91   |          | LOH wt     | Neg                        |
| 16      | 187delAG             | deletion           | 53  | Neg       | 97.2 |          | LOH wt     | Neg                        |
| 17      | 187delAG             | deletion           | 54  | Neg       | 97.9 |          | LOH wt     |                            |
| 18      | 187delAG             | deletion           | 41  | Neg       | 98.5 |          | LOH wt     |                            |
| 19      | 187delAG             | deletion           | 55  | Neg       | 99.2 |          | LOH wt     |                            |
| 20      | 187delAG             | deletion           | 72  | Pos       | 44   |          | no LOH     |                            |
| 21      | 187delAG             | deletion           | 47  | Pos       | 67.3 |          | LOH wt     |                            |
| 22      | 187delAG             | deletion           | 43  | Pos       | 82.3 |          | LOH wt     | Neg                        |
| 23      | 187delAG             | deletion           | 50  | Pos       | 86.7 |          | LOH wt     |                            |
| 24      | 187delAG             | deletion           | 42  | Pos       | 88.4 |          | LOH wt     |                            |
| 25      | 187delAG             | deletion           | 52  | Pos       | 88.6 |          | LOH wt     |                            |
| 26      | 187delAG             | deletion           | 34  | Pos       | 89.4 |          | LOH wt     | Neg                        |
| 27      | 187delAG             | deletion           | 56  | Pos       | 89.8 |          | LOH wt     |                            |
| 28      | 187delAG             | deletion           | 29  | Pos       | 93.5 |          | LOH wt     |                            |
| 29      | 187delAG             | deletion           | 45  | Pos       | 93.8 |          | LOH wt     | Neg                        |
| 30      | 187delAG             | deletion           | 55  | Pos       | 93.9 |          | LOH wt     |                            |
| 31      | 187delAG             | deletion           | 51  | Pos       | 94.9 |          | LOH wt     |                            |
| 32      | 187delAG             | deletion           | 68  | Pos       | 95.2 |          | LOH wt     |                            |
| 33      | 187delAG             | deletion           | 39  | Pos       | 96.1 |          | LOH wt     | Neg                        |
| 34      | 187delAG             | deletion           | 43  | Pos       | 96.1 |          | LOH wt     |                            |
| 35      | 187delAG             | deletion           | 51  | Pos       | 98.5 |          | LOH wt     |                            |
| 36      | 231delAA             | deletion           | 29  | Neg       | 98.3 |          | LOH wt     |                            |
| 37      | 2800delAA            | deletion           | 44  | Neg       | 97.4 |          | LOH wt     |                            |
| 38      | 2953delGTAINS        | insertion/deletion | 45  | Pos       | 83   |          | LOH wt     | Neg                        |
| 39      | 3148delCT            | deletion           | 35  | Neg       | 99.2 |          | LOH wt     |                            |
| 40      | 3450del4             | deletion           | 48  | Pos       | 89.3 |          | LOH wt     |                            |
| 41      | 3668delAGINS         | insertion/deletion | 39  | Pos       | 72.3 |          | LOH wt     | Neg                        |
| 42      | 3746insA             | insertion          | 46  | Neg       | 91   |          | LOH wt     |                            |
| 43      | 3790ins4             | insertion          | 49  | Pos       | 5.4  |          | LOH mut    | Neg                        |
| 44      | 4154delA             | deletion           | 63  | Pos       | 97   |          | LOH wt     |                            |
| 45      | 5385insC             | insertion          | 58  | Neg       | 3    |          | LOH mut    |                            |
| 46      | 5385insC             | insertion          | 61  | Neg       | 62.7 |          | LOH wt     |                            |
| 47      | 5385insC             | insertion          | 45  | Neg       | 77.8 |          | LOH wt     |                            |
| 48      | 5385insC             | insertion          | 50  | Neg       | 80   |          | LOH wt     | Neg                        |
| 49      | 5385insC             | insertion          | 44  | Neg       | 80.1 |          | LOH wt     |                            |
| 50      | 5385insC             | insertion          | 32  | Neg       | 85.5 |          | LOH wt     | Neg                        |
| 51      | 5385insC             | insertion          | 53  | Neg       | 90.4 |          | LOH wt     |                            |
| 52      | 5385insC             | insertion          | 42  | Neg       | 90.9 |          | LOH wt     | Neg                        |
| 53      | 5385insC             | insertion          | 32  | Neg       | 91   |          | LOH wt     |                            |
| 54      | 5385insC             | insertion          | 45  | Pos       | 27.1 |          | LOH mut    | Neg                        |
| 55      | 5385insC             | insertion          | 64  | Pos       | 45.3 |          | no LOH     | Neg                        |
| 56      | 5385insC             | insertion          | 39  | Pos       | 60.7 |          | no LOH     | Neg                        |
| 57      | 5385insC             | insertion          | 51  | Pos       | 82.3 |          | LOH wt     |                            |
| 58      | 5385insC             | insertion          | 34  | Pos       | 83.9 |          | LOH wt     | Neg                        |
| 59      | 5385insC             | insertion          | 46  | Pos       | 88.5 |          | LOH wt     |                            |
| 60      | 5385insC             | insertion          | 37  | Pos       | 89.7 |          | LOH wt     |                            |
| 61      | 5385insC             | insertion          | 46  | Pos       | 90   |          | LOH wt     |                            |
| 62      | 5454delC             | deletion           | 43  | Pos       | 88.7 |          | LOH wt     | Neg                        |
| 63      | 5589del8             | deletion           | 37  | Neg       | 80.7 |          | LOH wt     |                            |
| 64      | A1708E               | missense           | 66  | Neg       |      | 0.19     | LOH wt     |                            |
| 65      | C61G                 | missense           | 37  | Neg       |      | 0.31     | LOH wt     | Neg                        |
| 66      | E908X                | nonsense           | 41  | Pos       |      | 0.11     | LOH wt     |                            |
| 67      | IVS4-1G>T            | splicing           | 33  | Pos       |      | 0.96     | no LOH     | Neg                        |
| 68      | IVS4-1G>T            | splicing           | 59  | Pos       |      | 3.05     | LOH mut    | Pos                        |
| 69      | IVS4-1G>T            | splicing           | 32  | Neg       |      | 0.23     | LOH wt     | Neg                        |
| 70      | Q1323X               | nonsense           | 31  | Neg       |      | 0.05     | LOH wt     | Neg                        |
| 71      | Q1458X               | nonsense           | 39  | Neg       |      | 0.27     | LOH wt     |                            |
| 72      | Q1458X               | nonsense           | 52  | Pos       |      | 0.32     | LOH wt     |                            |
| 73      | R1495M               | missense           | 42  | Neg       |      | 0.48     | LOH wt     |                            |
| 74      | R1495M               | missense           | 51  | Pos       |      | 0.1      | LOH wt     | Neg                        |
| 75      | S713X                | nonsense           | 49  | Pos       |      | 0.02     | LOH wt     |                            |
| 76      | W321X                | nonsense           | 47  | Pos       |      | 0.08     | LOH wt     |                            |
| 77      | Y1463X               | nonsense           | 46  | Pos       |      | 0.13     | LOH wt     |                            |
